# Supplementary material
Source: PubMed Central journal article supplement (PMC7541738)
Supplement: NIHMS1619969-supplement-1.pdf [file NIHMS1619969-supplement-1.pdf]

## Supplemental Table 1

| BLOOD                          | Drug concentration (µg/g) |             |             | Total drug (µg) |             |             |
|--------------------------------|---------------------------|-------------|-------------|-----------------|-------------|-------------|
|                                | 4 h                       | 24 h        | 72 h        | 4 h             | 24 h        | 72 h        |
| Free CPT-11 (CPT-11)           | 1.22 ± 0.89               | 0.08 ± 0.04 | < 0.01      | 1.82 ± 1.33     | 0.12 ± 0.06 | < 0.01      |
| Free CPT-11 (SN38)             | 0.13 ± 0.07               | < 0.01      | < 0.01      | 0.19 ± 0.11     | < 0.01      | < 0.01      |
| Liposomal CPT-11 (CPT-11)      | 152 ± 9.3                 | 16.1 ± 12.9 | < 0.01      | 228 ± 14        | 24.1 ± 19.3 | < 0.01      |
| Liposomal CPT-11 (SN38)        | 2.62 ± 0.35               | 1.06 ± 0.58 | 0.01        | 3.93 ± 0.53     | 1.58 ± 0.88 | < 0.01      |
| PEG-[SN38] <sub>4</sub> (SN38) | 8.98 ± 0.47               | 1.05 ± 0.15 | 0.3 ± 0.05  | 13.5 ± 0.70     | 1.58 ± 0.23 | 0.45 ± 0.07 |
| PEG-[SN22] <sub>4</sub> (SN22) | 29.5 ± 1.01               | 4.34 ± 0.29 | 0.53 ± 0.11 | 44.3 ± 1.51     | 6.5 ± 0.44  | 0.79 ± 0.16 |

| TUMOR                          | Drug concentration (µg/g) |             |             |              | Total drug (µg) |             |             |              |
|--------------------------------|---------------------------|-------------|-------------|--------------|-----------------|-------------|-------------|--------------|
|                                | 4 h                       | 24 h        | 72 h        | 168 h        | 4 h             | 24 h        | 72 h        | 168 h        |
| Free CPT-11 (CPT-11)           | 22.5 ± 15                 | 1.18 ± 0.21 | < 0.01      |              | 35.99 ± 26      | 1.74 ± 0.72 | < 0.01      |              |
| Free CPT-11 (SN38)             | 0.14 ± 0.03               | 0.01        | < 0.01      |              | 0.22 ± 0.06     | 0.02 ± 0.01 | < 0.01      |              |
| Liposomal CPT-11 (CPT-11)      | 38 ± 6.6                  | 44.8 ± 7.7  | 6.8 ± 2.4   |              | 55.2 ± 11.9     | 30.7 ± 9.9  | 1.26 ± 0.22 |              |
| Liposomal CPT-11 (SN38)        | 0.72 ± 0.17               | 1.07 ± 0.22 | 0.27 ± 0.05 |              | 1.12 ± 0.46     | 0.78 ± 0.3  | 0.05 ± 0.01 |              |
| PEG-[SN38] <sub>4</sub> (SN38) | 3.11 ± 0.33               | 2.99 ± 0.22 | 3.47 ± 0.46 |              | 2.93 ± 0.39     | 1.37 ± 0.41 | 1.17 ± 0.33 |              |
| PEG-[SN22] <sub>4</sub> (SN22) | 6.67 ± 0.86               | 7.31 ± 0.52 | 26.48 ± 7.4 | 23.05 ± 5.25 | 5.06 ± 1.86     | 3.7 ± 1.32  | 3.14 ± 1.12 | 2.768 ± 0.37 |

| LIVER                          | Drug concentration (µg/g) |             |             |              | Total drug (µg) |             |             |              |
|--------------------------------|---------------------------|-------------|-------------|--------------|-----------------|-------------|-------------|--------------|
|                                | 4 h                       | 24 h        | 72 h        | 168 h        | 4 h             | 24 h        | 72 h        | 168 h        |
| Free CPT-11 (CPT-11)           | 36.6 ± 24.5               | 0.91 ± 0.35 | 0.02 ± 0.01 |              | 44.7 ± 30       | 1.11 ± 0.43 | 0.02 ± 0.01 |              |
| Free CPT-11 (SN38)             | 0.72 ± 0.24               | 0.01 ± 0.01 | < 0.01      |              | 0.89 ± 0.29     | 0.02 ± 0.01 | < 0.01      |              |
| Liposomal CPT-11 (CPT-11)      | 49.6 ± 2.8                | 18.6 ± 8.8  | 0.59 ± 0.3  |              | 60.7 ± 3.5      | 22.8 ± 10.8 | 0.72 ± 0.37 |              |
| Liposomal CPT-11 (SN38)        | 2.62 ± 0.40               | 0.80 ± 0.33 | 0.02        |              | 3.2 ± 0.49      | 0.97 ± 0.41 | 0.02 ± 0.01 |              |
| PEG-[SN38] <sub>4</sub> (SN38) | 2.13 ± 0.32               | 1.53 ± 0.17 | 2.48 ± 0.27 |              | 2.6 ± 0.39      | 1.87 ± 0.21 | 3.03 ± 0.33 |              |
| PEG-[SN22] <sub>4</sub> (SN22) | 3.41 ± 0.23               | 4.22 ± 0.31 | 4.25 ± 0.54 | 3.115 ± 0.32 | 4.17 ± 0.28     | 5.16 ± 0.37 | 5.2 ± 0.66  | 3.599 ± 0.24 |

| SPLEEN                         | Drug concentration (µg/g) |             |             |              | Total drug (µg) |             |             |              |
|--------------------------------|---------------------------|-------------|-------------|--------------|-----------------|-------------|-------------|--------------|
|                                | 4 h                       | 24 h        | 72 h        | 168 h        | 4 h             | 24 h        | 72 h        | 168 h        |
| Free CPT-11 (CPT-11)           | 184 ± 45                  | 1.8 ± 0.96  | 0.01        |              | 34.15 ± 5.9     | 0.33 ± 0.19 | < 0.01      |              |
| Free CPT-11 (SN38)             | 0.22 ± 0.05               | < 0.01      | < 0.01      |              | 0.04 ± 0.01     | < 0.01      | < 0.01      |              |
| Liposomal CPT-11 (CPT-11)      | 133.9 ± 16                | 67 ± 25.6   | 1.9 ± 0.8   |              | 21.8 ± 2        | 8.23 ± 2.25 | 0.19 ± 0.04 |              |
| Liposomal CPT-11 (SN38)        | 3.02 ± 0.72               | 1.13 ± 0.53 | 0.05 ± 0.03 |              | 0.49 ± 0.11     | 0.13 ± 0.04 | < 0.01      |              |
| PEG-[SN38] <sub>4</sub> (SN38) | 2.81 ± 0.27               | 2.50 ± 0.25 | 1.05 ± 0.15 |              | 0.34 ± 0.02     | 0.25 ± 0.06 | 0.23 ± 0.05 |              |
| PEG-[SN22] <sub>4</sub> (SN22) | 4.71 ± 0.30               | 6.21 ± 0.81 | 7.66 ± 1.14 | 6.078 ± 0.65 | 0.55 ± 0.06     | 0.78 ± 0.12 | 0.48 ± 0.06 | 0.665 ± 0.08 |

| INTESTINE                      | Drug concentration (µg/g) |             |             |              | Total drug (µg) |             |             |              |
|--------------------------------|---------------------------|-------------|-------------|--------------|-----------------|-------------|-------------|--------------|
|                                | 4 h                       | 24 h        | 72 h        | 168 h        | 4 h             | 24 h        | 72 h        | 168 h        |
| Free CPT-11 (CPT-11)           | 124 ± 83                  | 4.21 ± 2.97 | < 0.01      |              | 139 ± 93        | 4.72 ± 3.33 | < 0.01      |              |
| Free CPT-11 (SN38)             | 9.71 ± 5.61               | 0.10 ± 0.05 | < 0.01      |              | 10.9 ± 6.3      | 0.12 ± 0.06 | < 0.01      |              |
| Liposomal CPT-11 (CPT-11)      | 13.2 ± 3.3                | 6.3 ± 2.07  | 0.33 ± 0.08 |              | 14.82 ± 3.68    | 6.34 ± 2.07 | 0.33 ± 0.08 |              |
| Liposomal CPT-11 (SN38)        | 1.26 ± 0.18               | 1.17 ± 0.43 | 0.03        |              | 1.41 ± 0.2      | 1.31 ± 0.49 | 0.03 ± 0.01 |              |
| PEG-[SN38] <sub>4</sub> (SN38) | 2.31 ± 0.25               | 1.06 ± 0.17 | 0.39 ± 0.18 |              | 2.58 ± 1.18     | 1.18 ± 0.19 | 0.44 ± 0.03 |              |
| PEG-[SN22] <sub>4</sub> (SN22) | 3.08 ± 0.51               | 3.20 ± 0.36 | 2.24 ± 0.45 | 0.881 ± 0.11 | 3.45 ± 0.57     | 3.58 ± 0.40 | 2.51 ± 0.5  | 0.987 ± 0.12 |

| BRAIN                          | Drug concentration (µg/g) |             |             |             | Total drug (µg) |             |  |
|--------------------------------|---------------------------|-------------|-------------|-------------|-----------------|-------------|--|
|                                | 4 h                       | 24 h        | 72 h        | 4 h         | 24 h            | 72 h        |  |
| PEG-[SN38] <sub>4</sub> (SN38) | 0.21 ± 0.10               | 0.04 ± 0.01 | 0.03 ± 0.01 | 0.08 ± 0.04 | 0.01 ± 0.01     | < 0.01      |  |
| PEG-[SN22] <sub>4</sub> (SN22) | 0.33 ± 0.08               | 0.16 ± 0.01 | 0.18 ± 0.05 | 0.11 ± 0.03 | 0.06 ± 0.01     | 0.07 ± 0.02 |  |
