# Supplementary material
Source: PubMed Central journal article supplement (PMC7541738)
Supplement: NIHMS1619969-supplement-2.pdf [file NIHMS1619969-supplement-2.pdf]

## Supplemental Figure 1

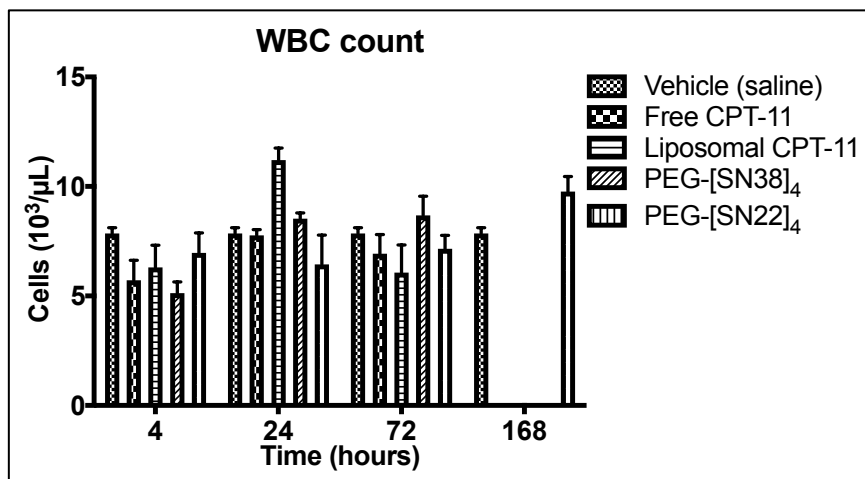

| WBC                              |                 |                         |
|----------------------------------|-----------------|-------------------------|
| Mean values ( $10^3$ ) $\pm$ SEM |                 |                         |
| Time                             | Vehicle         | PEG-[SN22] <sub>4</sub> |
| 4 h                              | 7.86 $\pm$ 0.26 | 9.77 $\pm$ 0.34         |
| 24 h                             |                 | 6.97 $\pm$ 0.46         |
| 72 h                             |                 | 6.45 $\pm$ 0.66         |
| 168 h                            |                 | 7.16 $\pm$ 0.30         |

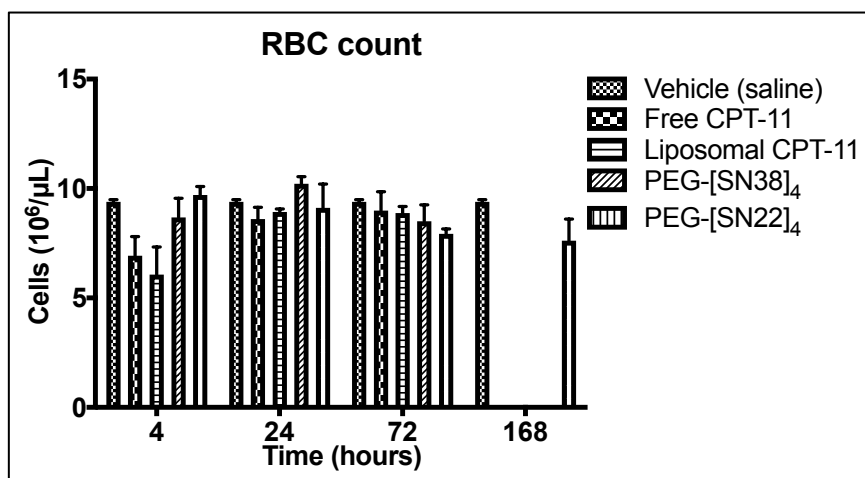

| RBC                              |                 |                         |
|----------------------------------|-----------------|-------------------------|
| Mean values ( $10^6$ ) $\pm$ SEM |                 |                         |
| Time                             | Vehicle         | PEG-[SN22] <sub>4</sub> |
| 4 h                              | 9.40 $\pm$ 0.10 | 9.71 $\pm$ 0.19         |
| 24 h                             |                 | 9.12 $\pm$ 0.55         |
| 72 h                             |                 | 7.93 $\pm$ 0.11         |
| 168 h                            |                 | 7.62 $\pm$ 0.49         |

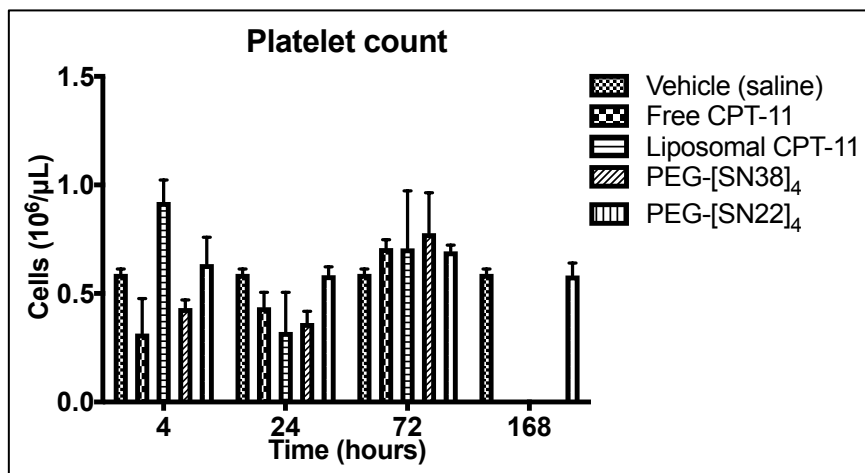

| Platelets                        |                 |                         |
|----------------------------------|-----------------|-------------------------|
| Mean values ( $10^6$ ) $\pm$ SEM |                 |                         |
| Time                             | Vehicle         | PEG-[SN22] <sub>4</sub> |
| 4 h                              | 0.59 $\pm$ 0.02 | 0.64 $\pm$ 0.06         |
| 24 h                             |                 | 0.58 $\pm$ 0.02         |
| 72 h                             |                 | 0.69 $\pm$ 0.01         |
| 168 h                            |                 | 0.58 $\pm$ 0.03         |

**Supplemental Figure 1. Complete blood counts.** Total WBC, RBC and platelet count of mice at various times after treatment with PEG-[SN22] compared to vehicle control. There was no significant change in WBC, RBC or platelet counts over 168 hours (7 days) after a single therapeutic dose.
