# Supplementary material
Source: PubMed Central journal article supplement (PMC7541738)
Supplement: NIHMS1619969-supplement-3.pdf [file NIHMS1619969-supplement-3.pdf]

## Supplemental Figure 2

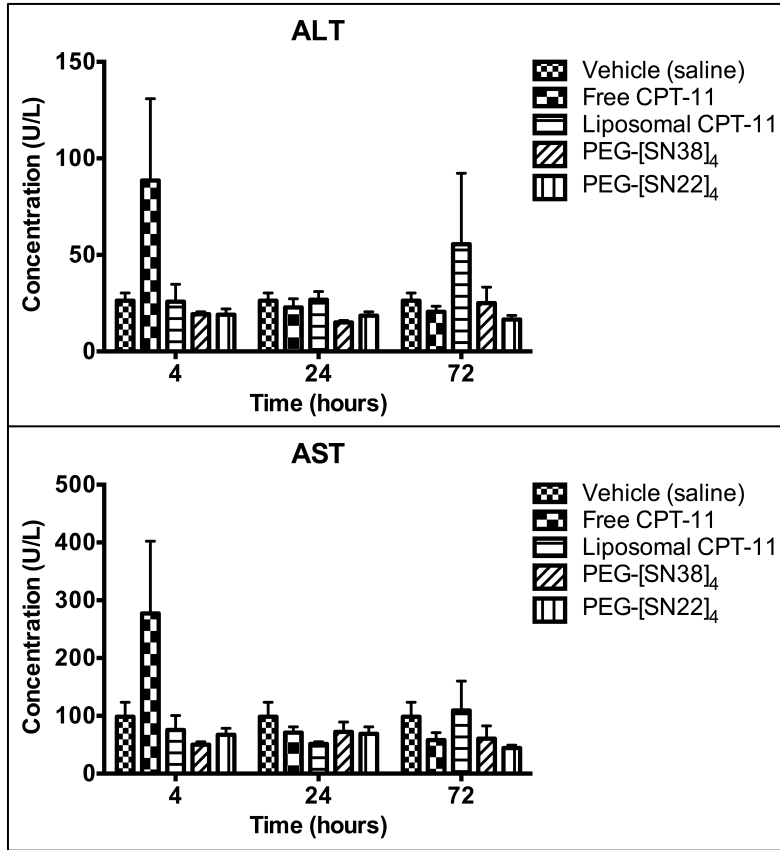

**Supplemental Figure 2. Liver transaminase levels.** Mice ( $n=4/\text{arm}$ ) were given a single dose of Free CPT-11 (15 mg/kg), Liposomal CPT-11 (15 mg/kg), PEG-[SN38]<sub>4</sub> (10 mg/kg), or PEG-[SN22]<sub>4</sub> (10 mg/kg). Liver enzymes (AST, ALT) levels were measured at 4, 24, and 72 h time points. Liver function is normal, although there are transient elevations of ALT and AST at 4 hr in the free CPT-11 group, and at 72 hr in the liposomal CPT-11 group.
